# Supplementary material for: CD117/c-kit in Cancer Stem Cell-Mediated Progression and Therapeutic Resistance
Source: PubMed Central journal article supplement (PMC5874688; doi:10.3390/biomedicines6010031), 2018-03-08
Supplement: biomedicines-06-00031-s001.pdf [file biomedicines-06-00031-s001.pdf]

| <b>Gene</b> | <b>Cancer Type</b>                                              | <b>% amplification or mutation or deletion</b> | <b># of Patients altered of total # of patients</b> | <b>Source data</b>                       |
|-------------|-----------------------------------------------------------------|------------------------------------------------|-----------------------------------------------------|------------------------------------------|
| KIT         | Seminoma                                                        | 34.4% Mutation<br>1.6% Amplification           | 23 of 64 patients                                   | TCGA, Provisional                        |
| KIT         | Mixed Germ Cell Tumor                                           | 5.9% Mutation<br>5.9% Amplification            | 1 of 17 patients                                    | TCGA Provisional                         |
| KIT         | Non-Seminomatous Germ Cell Tumor                                | 2.1 % Mutation                                 | 1 of 48 patients                                    | TCGA Provisional                         |
| KIT         | Prostate Adenocarcinoma                                         | 17% amplification                              | 18 of 109 patients                                  | Broad/Cornell, Nat Genet 2012            |
| KIT         | Glioblastoma Multiforme                                         | 11% Amplification<br>1.1% Mutation             | 11 of 91 patients                                   | TCGA, Nature 2008                        |
| KIT         | Seminoma                                                        | 3.6% Amplification<br>21.8% Mutation           |                                                     | MSK, JCO 2016                            |
| KIT         | Non-Seminomatous Germ Cell Tumor                                | 4% Mutation                                    | 5 of 125 cases                                      | MSK, JCO 2016                            |
| KIT         | Prostate Neuroendocrine Carcinoma                               | 2.3% Mutation<br>11.4% Alteration              | 13.6% of 44 cases                                   | Trento / Cornell / Broad 2016            |
| KIT         | Prostate Cancer                                                 | 9.5% Alteration                                | 9.5% of 63 cases                                    | Trento / Cornell / Broad 2016            |
| KIT         | Glioma                                                          | 10.5% Amplification<br>1.2% Mutation           | 29 of 248 cases                                     | TCGA , Cell 2013                         |
| KIT         | Undefined                                                       | 3% Amplification                               | 1 of 33 cases                                       | TCGA , Cell 2013                         |
| KIT         | Cutaneous Squamous Cell Carcinoma                               | 10.3% Mutation                                 | 3 of 29 cases                                       | DFIC, Clin Cancer Res 2015               |
| KIT         | Invasive Breast Carcinoma                                       | 10.3% Amplification                            | 3 of 29 cases                                       | British Columbia, Nature 2014            |
| KIT         | Glioblastoma Multiforme                                         | 9.2% Amplification<br>1.1% Mutation            | 28 of 273 cases                                     | TCGA, Provisional                        |
| KIT         | Desmoplastic Melanoma                                           | 10% Mutation                                   | 2 of 20 cases                                       | Broad Institute, Nat Genet 2015          |
| KIT         | Uterine Carcinosarcoma /Uterine Malignant Mixed Mullerian Tumor | 9.1% Mutation                                  | 2 of 22 cases                                       | John Hopkins University, Nat Commun 2014 |
| KIT         | Lung Squamous Cell Carcinoma                                    | 5.1% Amplification<br>2.3% Mutation            | 15 of 177 cases                                     | TCGA, Provisional                        |

|     |                                |                                                    |                     |                                                                                                |
|-----|--------------------------------|----------------------------------------------------|---------------------|------------------------------------------------------------------------------------------------|
| KIT | Lung Squamous Cell Carcinoma   | 4.5% Amplification<br>3.4% Mutation                | 15 of 178 cases     | TCGA, Nature 2012                                                                              |
| KIT | Melanoma                       | 8.3% Mutation                                      | 2 out of 24 cases   | Melanoma (Broad/Dana Farber, Nature 2012)                                                      |
| KIT | Uterine Endometrioid Carcinoma | 5% Amplification<br>8.8% Mutation                  | 18 out of 193 cases | Uterine Corpus Endometrial Carcinoma (TCGA, Nature 2013)                                       |
| KIT | Non-Small Cell Lung Cancer     | 7.3% Mutation                                      | 3 of 41 cases       | Genetic Characterization of NSCLC young adult patients (University of Turin, Lung Cancer 2016) |
| KIT | Mixed Cancer Types             | 4.2% Mutation<br>1.9% Amplification<br>1% Deletion | 64 of 881 cases     | Cancer Cell Line Encyclopedia (Novartis/Broad, Nature 2012)                                    |
| KIT | Sezary Syndrome                | 11.5% Mutation                                     | 3 out of 26 cases   | Cutaneous T Cell Lymphoma (Columbia U, Nat Genet 2015)                                         |
| KIT | Uterine Endometrioid Carcinoma | 8.7% Mutation                                      | 17 of 195 cases     | Uterine Corpus Endometrial Carcinoma (TCGA, Provisional)                                       |
| KIT | Salivary Gland Cancer          | 12% Amplification                                  | 6 of 50 cases       | Recurrent and Metastatic Head & Neck Cancer (JAMA Oncology, 2016)                              |
| KIT | Skin Cancer, Non-Melanoma      | 10.5% Mutation                                     | 2 of 19 cases       | Recurrent and Metastatic Head & Neck Cancer (JAMA Oncology, 2016)                              |

|     |                                         |                                                      |                 |                                                                   |
|-----|-----------------------------------------|------------------------------------------------------|-----------------|-------------------------------------------------------------------|
| KIT | Head and Neck Cancer                    | 1.6% Mutation                                        | 1 of 62 cases   | Recurrent and Metastatic Head & Neck Cancer (JAMA Oncology, 2016) |
| KIT | Malignant Peripheral Nerve Sheath Tumor | 6.7% Amplification                                   | 1 of 15 cases   | Malignant Peripheral Nerve Sheath Tumor (MSKCC, Nat Genet 2014)   |
| KIT | Cutaneous Melanoma                      | 3.1% Mutation<br>2.4% Amplification                  | 19 of 287 cases | Skin Cutaneous Melanoma (TCGA, Provisional)                       |
| KIT | Small Cell Lung Cancer                  | 6.4% Mutation                                        | 7 of 110 cases  | Small Cell Lung Cancer (U Cologne, Nature 2015)                   |
| KIT | Diffuse Glioma                          | 5% Amplification<br>0.8% Mutation                    | 47 of 794 cases | Merged Cohort of LGG and GBM (TCGA, Cell 2016)                    |
| KIT | Cancer Of Unknown Primary               | 10% Mutation                                         | 3 of 30 cases   | NCI-60 Cell Lines (NCI, Cancer Res. 2012)                         |
| KIT | Lung Squamous Cell Carcinoma            | 4.3% Amplification<br>3.5% Mutation<br>0.2% Deletion | 41 of 484 cases | Pan-Lung Cancer (TCGA, Nat Genet 2016)                            |
| KIT | Lung Adenocarcinoma                     | 1.4% Amplification<br>2% Mutation                    | 23 of 660 cases | Pan-Lung Cancer (TCGA, Nat Genet 2016)                            |

|     |                                    |                                                      |                 |                                                                                                                                                     |
|-----|------------------------------------|------------------------------------------------------|-----------------|-----------------------------------------------------------------------------------------------------------------------------------------------------|
| KIT | Colorectal Adenocarcinoma          | 5.6% Mutation                                        | 4 of 72 cases   | Colorectal Adenocarcinoma (Genentech, Nature 2012)                                                                                                  |
| KIT | Esophageal Adenocarcinoma          | 3.4% Mutation<br>2.3% Amplification                  | 5 of 88 cases   | Esophageal Carcinoma (TCGA, Provisional)                                                                                                            |
| KIT | Esophageal Squamous Cell Carcinoma | 3.1% Mutation<br>1% Deletion<br>1% Amplification     | 5 of 96 cases   | Esophageal Carcinoma (TCGA, Provisional)                                                                                                            |
| KIT | Sarcoma                            | 2.9% Mutation<br>2.4% Amplification                  | 11 of 207 cases | Sarcoma (MSKCC/Broad, Nat Genet 2010)                                                                                                               |
| KIT | Cutaneous Melanoma                 | 4.5% Mutation                                        | 3 of 66 cases   | PTEN loss of function alterations are associated with intrinsic resistance to BRAF inhibitors in metastatic melanoma (JCO Precision Oncology, 2017) |
| KIT | Stomach Adenocarcinoma             | 4.5% Mutation                                        | 1 of 22 cases   | Stomach Adenocarcinoma (UHK, Nat Genet 2011)                                                                                                        |
| KIT | Stomach Adenocarcinoma             | 3.1% Mutation<br>0.7% Deletion<br>0.3% Amplification | 13 of 287 cases | Stomach Adenocarcinoma (TCGA, Nature 2014)                                                                                                          |

|     |                                           |                                                      |                 |                                                                      |
|-----|-------------------------------------------|------------------------------------------------------|-----------------|----------------------------------------------------------------------|
| KIT | Esophagogastric Carcinoma                 | 3.9% Mutation<br>2.6% Amplification                  | 5 of 77 cases   | TCGA data for Esophagus-Stomach Cancers (TCGA, Nature 2017)          |
| KIT | Stomach Adenocarcinoma                    | 2.1% Mutation<br>1.1% Amplification<br>0.5% Deletion | 7 of 188 cases  | TCGA data for Esophagus-Stomach Cancers (TCGA, Nature 2017)          |
| KIT | Ovarian Cancer                            | 1.9% Mutation<br>1.9% Amplification<br>0.3% Deletion | 13 of 310 cases | Ovarian Serous Cystadenocarcinoma (TCGA, Provisional)                |
| KIT | Cutaneous Melanoma                        | 4.4% Mutation                                        | 4 of 91 cases   | Skin Cutaneous Melanoma (Yale, Nat Genet 2012)                       |
| KIT | Acinar Cell Carcinoma of the Pancreas     | 4.3% Mutation                                        | 1 of 23 cases   | Acinar Cell Carcinoma of the Pancreas (Johns Hopkins, J Pathol 2014) |
| KIT | Nerve Sheath Tumor                        | 12.5% Mutation                                       | 1 of 8 cases    | Sarcoma (TCGA, Provisional)                                          |
| KIT | Soft Tissue Sarcoma                       | 1.3% Mutation<br>2.6% Amplification                  | 9 of 235 cases  | Sarcoma (TCGA, Provisional)                                          |
| KIT | Signet Ring Cell Carcinoma of the Stomach | 22.2% Deletion                                       | 2 of 9 cases    | Stomach Adenocarcinoma (TCGA,                                        |

|     |                                     |                                     |                |                                                                |
|-----|-------------------------------------|-------------------------------------|----------------|----------------------------------------------------------------|
| KIT | Mucinous Stomach Adenocarcinoma     | 5% Mutation                         | 1 of 20 cases  | Stomach Adenocarcinoma (TCGA,                                  |
| KIT | Tubular Stomach Adenocarcinoma      | 4.9% Mutation                       | 3 of 61 cases  | Stomach Adenocarcinoma (TCGA,                                  |
| KIT | Diffuse Type Stomach Adenocarcinoma | 1.4% Mutation<br>1.4% Amplification | 3 of 70 cases  | Stomach Adenocarcinoma (TCGA,                                  |
| KIT | Stomach Adenocarcinoma              | 2.2% Mutation<br>0.9% Amplification | 7 of 227 cases | Stomach Adenocarcinoma (TCGA,                                  |
| KIT | Bladder Urothelial Carcinoma        | 2.4% Mutation<br>1.6% Amplification | 5 of 127 cases | Bladder Urothelial Carcinoma (TCGA, Provisional)               |
| KIT | Lung Adenocarcinoma                 | 2.2% Mutation<br>1.7% Amplification | 9 of 230 cases | Lung Adenocarcinoma (TCGA, Provisional)                        |
| KIT | Metastatic Breast Cancer            | 1.9% Mutation<br>1.9% Amplification | 8 of 213 cases | Mutational profiles of metastatic breast cancer (France, 2016) |
| KIT | Acute Myeloid Leukemia              | 3.7% Mutation                       | 7 of 188 cases | Acute Myeloid Leukemia (TCGA, Provisional)                     |

|     |                                                   |                                                     |                 |                                                             |
|-----|---------------------------------------------------|-----------------------------------------------------|-----------------|-------------------------------------------------------------|
| KIT | Pancreatic Adenocarcinoma                         | 0.9% Amplification<br>2.8% Deletion                 | 4 of 109 cases  | Pancreatic Cancer (UTSW, Nat Commun 2015)                   |
| KIT | Acute Myeloid Leukemia                            | 3.7% Mutation                                       | 7 of 191 cases  | Acute Myeloid Leukemia (TCGA, NEJM 2013)                    |
| KIT | Prostate Adenocarcinoma                           | 1.8% Mutation<br>1.8% Amplification                 | 2 of 56 cases   | Prostate Adenocarcinoma (Broad/Cornell, Cell 2013)          |
| KIT | Colorectal Adenocarcinoma                         | 3.6% Mutation                                       | 22 of 619 cases | Colorectal Adenocarcinoma (DFCI, Cell Reports 2016)         |
| KIT | Lung Adenocarcinoma ( Non-Small Cell Lung Cancer) | 2.2% Mutation<br>1.3% Amplification                 | 8 of 223 cases  | Lung Adenocarcinoma (TCGA, Nature 2014)                     |
| KIT | Small Cell Lung Cancer                            | 3.5% Mutation                                       | 1 of 29 cases   | Small Cell Lung Cancer (CLCGP, Nat Genet 2012)              |
| KIT | Gastrointestinal Stromal Tumor                    | 62% Mutation<br>0.7% Amplification<br>0.7% Deletion | 91 of 137 cases | MSK-IMPACT Clinical Sequencing Cohort (MSKCC, Nat Med 2017) |
| KIT | Penile Cancer                                     | 14.3% Mutation                                      | 1 of 7 cases    | MSK-IMPACT Clinical Sequencing Cohort (MSKCC, Nat Med 2017) |

|     |                           |                                      |                 |                                                                         |
|-----|---------------------------|--------------------------------------|-----------------|-------------------------------------------------------------------------|
| KIT | Germ Cell Tumor           | 10.1% Mutation<br>0.7% Amplification | 33 of 288 cases | MSK-IMPACT<br>Clinical<br>Sequencing<br>Cohort (MSKCC,<br>Nat Med 2017) |
| KIT | undefined                 | 3.5% Mutation<br>1.8% Deletion       | 5 of 57 cases   | MSK-IMPACT<br>Clinical<br>Sequencing<br>Cohort (MSKCC,<br>Nat Med 2017) |
| KIT | Glioma                    | 1.3% Mutation<br>6.1% Amplification  | 42 of 553 cases | MSK-IMPACT<br>Clinical<br>Sequencing<br>Cohort (MSKCC,<br>Nat Med 2017) |
| KIT | Melanoma                  | 3.7% Mutation<br>1.4% Amplification  | 25 of 350 cases | MSK-IMPACT<br>Clinical<br>Sequencing<br>Cohort (MSKCC,<br>Nat Med 2017) |
| KIT | Small Cell Lung Cancer    | 4.4% Mutation<br>2.2% Amplification  | 6 of 91 cases   | MSK-IMPACT<br>Clinical<br>Sequencing<br>Cohort (MSKCC,<br>Nat Med 2017) |
| KIT | Salivary Gland Cancer     | 6.1% Amplification                   | 7 of 114 cases  | MSK-IMPACT<br>Clinical<br>Sequencing<br>Cohort (MSKCC,<br>Nat Med 2017) |
| KIT | Skin Cancer, Non-Melanoma | 6.1% Mutation                        | 9 of 148 cases  | MSK-IMPACT<br>Clinical<br>Sequencing<br>Cohort (MSKCC,<br>Nat Med 2017) |
| KIT | Thymic Tumor              | 5.6% Mutation                        | 1 of 18 cases   | MSK-IMPACT<br>Clinical<br>Sequencing<br>Cohort (MSKCC,<br>Nat Med 2017) |



|     |                          |                                     |                  |                                                             |
|-----|--------------------------|-------------------------------------|------------------|-------------------------------------------------------------|
| KIT | Adrenocortical Carcinoma | 3.8% Mutation                       | 1 of 26 cases    | MSK-IMPACT Clinical Sequencing Cohort (MSKCC, Nat Med 2017) |
| KIT | Bladder Cancer           | 3.5% Mutation                       | 15 of 423 cases  | MSK-IMPACT Clinical Sequencing Cohort (MSKCC, Nat Med 2017) |
| KIT | Soft Tissue Sarcoma      | 1.4% Mutation<br>2.1% Amplification | 15 of 434 cases  | MSK-IMPACT Clinical Sequencing Cohort (MSKCC, Nat Med 2017) |
| KIT | Endometrial Cancer       | 3.2% Mutation                       | 7 of 218 cases   | MSK-IMPACT Clinical Sequencing Cohort (MSKCC, Nat Med 2017) |
| KIT | Anal Cancer              | 3.1% Mutation                       | 1 of 32 cases    | MSK-IMPACT Clinical Sequencing Cohort (MSKCC, Nat Med 2017) |
| KIT | Bone Cancer              | 3% Amplification                    | 4 of 134 cases   | MSK-IMPACT Clinical Sequencing Cohort (MSKCC, Nat Med 2017) |
| KIT | Colorectal Cancer        | 2.6% Mutation<br>0.1% Deletion      | 27 of 1006 cases | MSK-IMPACT Clinical Sequencing Cohort (MSKCC, Nat Med 2017) |
| KIT | Appendiceal Cancer       | 1.3% Mutation<br>1.3% Amplification | 2 of 79 cases    | MSK-IMPACT Clinical Sequencing Cohort (MSKCC, Nat Med 2017) |

|     |                            |                                     |                  |                                                             |
|-----|----------------------------|-------------------------------------|------------------|-------------------------------------------------------------|
| KIT | Non-Small Cell Lung Cancer | 2% Mutation<br>0.4% Amplification   | 39 of 1659 cases | MSK-IMPACT Clinical Sequencing Cohort (MSKCC, Nat Med 2017) |
| KIT | Head and Neck Cancer       | 1.7% Mutation<br>0.6% Amplification | 4 of 173 cases   | MSK-IMPACT Clinical Sequencing Cohort (MSKCC, Nat Med 2017) |
| KIT | Ovarian Cancer             | 1.8% Mutation<br>0.4% Deletion      | 5 of 224 cases   | MSK-IMPACT Clinical Sequencing Cohort (MSKCC, Nat Med 2017) |
| KIT | Cancer of Unknown Primary  | 1.6% Mutation                       | 3 of 184 cases   | MSK-IMPACT Clinical Sequencing Cohort (MSKCC, Nat Med 2017) |
| KIT | Esophagogastric Cancer     | 1.5% Mutation                       | 5 of 341 cases   | MSK-IMPACT Clinical Sequencing Cohort (MSKCC, Nat Med 2017) |
| KIT | Non-Hodgkin Lymphoma       | 1.2% Deletion                       | 2 of 165 cases   | MSK-IMPACT Clinical Sequencing Cohort (MSKCC, Nat Med 2017) |
| KIT | Hepatobiliary Cancer       | 1.2% Mutation                       | 4 of 338 cases   | MSK-IMPACT Clinical Sequencing Cohort (MSKCC, Nat Med 2017) |
| KIT | Adenoid Cystic Carcinoma   | 3.3% Amplification                  | 2 of 60 cases    | Adenoid Cystic Carcinoma (MSKCC, Nat Genet 2013)            |

|     |                                  |                                     |                 |                                                                              |
|-----|----------------------------------|-------------------------------------|-----------------|------------------------------------------------------------------------------|
| KIT | Prostate Adenocarcinoma          | 2% Mutation<br>1.3% Amplification   | 5 of 150 cases  | Metastatic Prostate Cancer, SU2C/PCF Dream Team (Robinson et al., Cell 2015) |
| KIT | Cutaneous Melanoma               | 3.3% Mutation                       | 4 of 121 cases  | Skin Cutaneous Melanoma (Broad, Cell 2012)                                   |
| KIT | Lung Adenocarcinoma              | 3.3% Mutation                       | 6 of 182 cases  | Lung Adenocarcinoma (Broad, Cell 2012)                                       |
| KIT | Anaplastic Oligoastrocytoma      | 2.2% Mutation<br>6.7% Amplification | 4 of 45 cases   | Brain Lower Grade Glioma (TCGA, Provisional)                                 |
| KIT | Anaplastic Astrocytoma           | 7.5% Amplification                  | 5 of 67 cases   | Brain Lower Grade Glioma (TCGA, Provisional)                                 |
| KIT | High-Grade Serous Ovarian Cancer | 1.9% Mutation<br>1.3% Amplification | 10 of 316 cases | Ovarian Serous Cystadenocarcinoma (TCGA, Nature 2011)                        |
| KIT | Bladder Urothelial Carcinoma     | 2.4% Mutation<br>0.8% Amplification | 4 of 127 cases  | Bladder Urothelial Carcinoma (TCGA, Nature 2014)                             |
| KIT | Bladder Urothelial Carcinoma     | 3% Mutation                         | 1 of 33 cases   | Bladder Cancer, Plasmacytoid Variant (MSKCC, Nat Genet 2016)                 |

|     |                                                 |                                     |                 |                                                                                      |
|-----|-------------------------------------------------|-------------------------------------|-----------------|--------------------------------------------------------------------------------------|
| KIT | Hepatocellular Carcinoma                        | 3.1% Mutation                       | 11 of 355 cases | Liver Hepatocellular Carcinoma (TCGA, Provisional)                                   |
| KIT | Intrahepatic Cholangiocarcinoma                 | 3.4% Mutation                       | 1 of 29 cases   | Cholangiocarcinoma (TCGA, Provisional)                                               |
| KIT | Colorectal Adenocarcinoma                       | 2.8% Mutation                       | 6 of 212 cases  | Colorectal Adenocarcinoma (TCGA, Nature 2012)                                        |
| KIT | Head and Neck Squamous Cell Carcinoma           | 2.2% Mutation<br>0.6% Amplification | 14 of 504 cases | Head and Neck Squamous Cell Carcinoma (TCGA, Provisional)                            |
| KIT | Mucinous Adenocarcinoma of the Colon and Rectum | 8.7% Mutation                       | 2 of 23 cases   | Colorectal Adenocarcinoma (TCGA, Provisional)                                        |
| KIT | Colon Adenocarcinoma                            | 2.3% Mutation                       | 3 of 129 cases  | Colorectal Adenocarcinoma (TCGA, Provisional)                                        |
| KIT | Rectal Adenocarcinoma                           | 1.5% Mutation                       | 1 of 68 cases   | Colorectal Adenocarcinoma (TCGA, Provisional)                                        |
| KIT | Endometrioid Carcinoma                          | 50% Mutation                        | 1 of 2 cases    | Cervical Squamous Cell Carcinoma and Endocervical Adenocarcinoma (TCGA, Provisional) |

|     |                                       |                                                      |                |                                                                                      |
|-----|---------------------------------------|------------------------------------------------------|----------------|--------------------------------------------------------------------------------------|
| KIT | Endocervical Adenocarcinoma           | 3.8% Mutation                                        | 1 of 26 cases  | Cervical Squamous Cell Carcinoma and Endocervical Adenocarcinoma (TCGA, Provisional) |
| KIT | Cervical Squamous Cell Carcinoma      | 0.6% Mutation<br>0.6% Amplification<br>0.6% Deletion | 3 of 155 cases | Cervical Squamous Cell Carcinoma and Endocervical Adenocarcinoma (TCGA, Provisional) |
| KIT | Small Cell Lung Cancer                | 2.4% Mutation                                        | 1 of 42 cases  | Small Cell Lung Cancer (Johns Hopkins, Nat Genet 2012)                               |
| KIT | Head and Neck Squamous Cell Carcinoma | 1.4% Mutation<br>0.7% Amplification                  | 6 of 279 cases | Head and Neck Squamous Cell Carcinoma (TCGA, Nature 2015)                            |
| KIT | Stomach Adenocarcinoma                | 2% Mutation                                          | 2 of 100 cases | Stomach Adenocarcinoma (Pfizer and UHK, Nat Genet 2014)                              |
| KIT | Prostate Adenocarcinoma               | 1% Mutation<br>1% Amplification                      | 2 of 103 cases | Prostate Adenocarcinoma (MSKCC, Cancer Cell 2010)                                    |
| KIT | Unclassified Renal Cell Carcinoma     | 1.9% Amplification                                   | 1 of 52 cases  | Unclassified Renal Cell Carcinoma (MSKCC 2016)                                       |

|     |                                                                             |                                                      |                 |                                                             |
|-----|-----------------------------------------------------------------------------|------------------------------------------------------|-----------------|-------------------------------------------------------------|
| KIT | Breast Invasive Carcinoma                                                   | 1% Mutation<br>0.7% Amplification<br>0.1% Deletion   | 15 of 816 cases | Breast Invasive Carcinoma (TCGA, Cell 2015)                 |
| KIT | Summary for Uterine Carcinosarcoma /Uterine Malignant Mixed Mullerian Tumor | 1.8% Mutation                                        | 1 of 56 cases   | Uterine Carcinosarcoma (TCGA, Provisional)                  |
| KIT | Nasopharyngeal Carcinoma                                                    | 1.8% Mutation                                        | 1 of 56 cases   | Nasopharyngeal Carcinoma (Singapore, Nat Genet 2014)        |
| KIT | Breast Cancer                                                               | 0.7% Mutation<br>0.9% Amplification<br>0.1% Deletion | 17 of 962 cases | Breast Invasive Carcinoma (TCGA, Provisional)               |
| KIT | Diffuse Large B-Cell Lymphoma                                               | 1.7% Mutation                                        | 1 of 58 cases   | Diffuse Large B-Cell Lymphoma (Broad, PNAS 2012)            |
| KIT | Prostate Adenocarcinoma                                                     | 1.6% Multiple Alterations                            | 1 of 61 cases   | Prostate Adenocarcinoma, Metastatic (Michigan, Nature 2012) |
| KIT | Prostate Adenocarcinoma                                                     | 0.7% Mutation<br>0.7% Amplification                  | 2 of 136 cases  | Prostate Adenocarcinoma (Fred Hutchinson CRC, Nat Med 2016) |
| KIT | Prostate Adenocarcinoma                                                     | 0.4% Mutation<br>0.2% Amplification<br>0.8% Deletion | 7 of 492 cases  | Prostate Adenocarcinoma (TCGA, Provisional)                 |

|     |                                       |                                     |                  |                                                             |
|-----|---------------------------------------|-------------------------------------|------------------|-------------------------------------------------------------|
| KIT | Esophagogastric Cancer                | 1.4% Mutation                       | 2 of 145 cases   | Esophageal Adenocarcinoma (Broad, Nat Genet 2013)           |
| KIT | Head and Neck Squamous Cell Carcinoma | 1.4% Mutation                       | 1 of 74 cases    | Head and Neck Squamous Cell Carcinoma (Broad, Science 2011) |
| KIT | Hepatocellular Carcinoma              | 0.9% Mutation<br>0.4% Amplification | 3 of 231 cases   | Liver Hepatocellular Carcinoma (AMC, Hepatology 2014)       |
| KIT | Esophagogastric Adenocarcinoma        | 1.3% Mutation                       | 1 of 78 cases    | Gastric Adenocarcinoma (TMUCIH, PNAS 2015)                  |
| KIT | Melanoma                              | 1.3% Deletion                       | 1 of 79 cases    | Uveal Melanoma (TCGA, Provisional)                          |
| KIT | Hepatocellular Carcinoma              | 1.2% Mutation                       | 3 of 243 cases   | Hepatocellular Carcinomas (Inserm, Nat Genet 2015)          |
| KIT | Pheochromocytoma                      | 0.7% Mutation<br>0.7% Amplification | 2 of 135 cases   | Pheochromocytoma and Paraganglioma (TCGA, Provisional)      |
| KIT | Breast Cancer                         | 1.2% Amplification<br>0% Deletion   | 25 of 2050 cases | Breast Cancer (METABRIC, Nature 2012 & Nat Commun 2016)     |

|     |                                        |                                     |                |                                                                            |
|-----|----------------------------------------|-------------------------------------|----------------|----------------------------------------------------------------------------|
| KIT | Prostate Adenocarcinoma                | 0.3% Amplification<br>0.9% Deletion | 4 of 333 cases | Prostate Adenocarcinoma (TCGA, Cell 2015)                                  |
| KIT | Renal Clear Cell Carcinoma             | 0.7% Mutation<br>0.5% Amplification | 5 of 418 cases | Kidney Renal Clear Cell Carcinoma (TCGA, Nature 2013)                      |
| KIT | Pleural Mesothelioma, Epithelioid Type | 1.8% Mutation                       | 1 of 57 cases  | Mesothelioma (TCGA, Provisional)                                           |
| KIT | Esophageal Squamous Cell Carcinoma     | 1.1% Mutation                       | 1 of 88 cases  | Esophageal Squamous Cell Carcinoma (ICGC, Nature 2014)                     |
| KIT | Breast Invasive Carcinoma              | 1% Mutation                         | 5 of 482 cases | Breast Invasive Carcinoma (TCGA, Nature 2012)                              |
| KIT | Pancreatic Neuroendocrine Tumor        | 1% Mutation                         | 1 of 98 cases  | Whole-Genome Sequencing of Pancreatic Neuroendocrine Tumors (Nature, 2017) |
| KIT | Bladder Urothelial Carcinoma           | 1% Mutation                         | 1 of 99 cases  | Bladder Urothelial Carcinoma (BGI, Nat Genet 2013)                         |
| KIT | Multiple Myeloma                       | 1% Mutation                         | 2 of 197 cases | Multiple Myeloma (Broad, Cancer Cell 2014)                                 |



|     |                                    |               |                |                                                           |
|-----|------------------------------------|---------------|----------------|-----------------------------------------------------------|
| KIT | Pediatric Ewing Sarcoma            | 1% Mutation   | 1 of 101 cases | Pediatric Ewing Sarcoma (DFCI, Cancer Discov 2014)        |
| KIT | Clear Cell Renal Cell Carcinoma    | 0.9% Mutation | 1 of 106 cases | Clear Cell Renal Cell Carcinoma (U Tokyo, Nat Genet 2013) |
| KIT | Bladder Cancer                     | 0.9% Mutation | 1 of 109 cases | Bladder Cancer (MSKCC, Eur Urol 2014)                     |
| KIT | Thymoma                            | 0.8% Mutation | 1 of 123 cases | Thymoma (TCGA, Provisional)                               |
| KIT | Pancreatic Adenocarcinoma          | 0.8% Mutation | 3 of 383 cases | Pancreatic Adenocarcinoma (QCMG, Nature 2016)             |
| KIT | Esophageal Squamous Cell Carcinoma | 0.7% Mutation | 1 of 137 cases | Esophageal Squamous Cell Carcinoma (UCLA, Nat Genet 2014) |
| KIT | Pancreatic Adenocarcinoma          | 0.7% Mutation | 1 of 149 cases | Pancreatic Adenocarcinoma (TCGA, Provisional)             |

|     |                                              |                    |                |                                                                      |
|-----|----------------------------------------------|--------------------|----------------|----------------------------------------------------------------------|
| KIT | Chronic Lymphocytic Leukemia                 | 0.6% Mutation      | 1 of 160 cases | Chronic Lymphocytic Leukemia (Broad, Cell 2013)                      |
| KIT | Lung Adenocarcinoma                          | 0.6% Mutation      | 1 of 163 cases | Lung Adenocarcinoma (TSP, Nature 2008)                               |
| KIT | MSK-IMPACT Clinical Sequencing Cohort        | 0.4% Mutation      | 2 of 501 cases | MSK-IMPACT Clinical Sequencing Cohort (MSKCC): Prostate Cancer       |
| KIT | Kidney Renal Clear Cell Carcinoma            | 0.2% Amplification | 1 of 448 cases | Kidney Renal Clear Cell Carcinoma (TCGA, Provisional)                |
| KIT | Genomic Hallmarks of Prostate Adenocarcinoma | 0.2% Mutation      | 1 of 449 cases | Genomic Hallmarks of Prostate Adenocarcinoma (CPC-GENE, Nature 2017) |
| KIT | Chronic Lymphocytic Leukemia                 | 0.2% Mutation      | 1 of 506 cases | Chronic Lymphocytic Leukemia (IUOPA, Nature 2015)                    |

**Table S1. Mutations and Amplifications of CD117/KIT in Cancer Datasets.** Using cBioPortal the percentage of amplifications, mutations, deletions, and alterations were mined for the *KIT* gene across all available cancers. Summarized data is shown in the table.

| <b>Gene</b> | <b>Cancer Type</b>                              | <b>% amplification or mutation or deletion</b> | <b># of Patients altered of total # of patients</b> | <b>Source data</b>                                               |
|-------------|-------------------------------------------------|------------------------------------------------|-----------------------------------------------------|------------------------------------------------------------------|
| KITLG       | Prostate Cancer                                 | 14.3% Amplification<br>1.6% Mutation           | 10 of 63 patients                                   | Neuroendocrine Prostate Cancer (Trento/Cornell/Broad 2016)       |
| KITLG       | Prostate Neuroendocrine Carcinoma               | 13.6% Amplification                            | 6 of 44 patients                                    | Neuroendocrine Prostate Cancer (Trento/Cornell/Broad 2016)       |
| KITLG       | Pancreatic Adenocarcinoma                       | 0.9% Amplification<br>7.3% Deletion            | 9 of 109 patients                                   | Pancreatic Cancer (UTSW, Nat Commun 2015)                        |
| KITLG       | Prostate Cancer                                 | 50% Mutation                                   | 1 of 2 patients                                     | NCI-60 Cell Lines (NCI, Cancer Res. 2012)                        |
| KITLG       | Cancer of Unknown Primary                       | 6.2% Mutation                                  | 3 of 30 patients                                    | NCI-60 Cell Lines (NCI, Cancer Res. 2012)                        |
| KITLG       | Mutational profiles of metastatic breast cancer | 7% Amplification<br>0.5% Deletion              | 16 of 213 patients                                  | Matic breast cancer (France, 2016)                               |
| KITLG       | Invasive Breast Carcinoma                       | 6.9% Amplification                             | 2 of 29 patients                                    | Breast cancer patient xenografts (British Columbia, Nature 2014) |
| KITLG       | Sarcoma                                         | 6.3% Amplification                             | 13 of 207 patients                                  | Sarcoma (MSKCC/Broad,                                            |

|       |                               |                                     |                    |                                                                                                   |
|-------|-------------------------------|-------------------------------------|--------------------|---------------------------------------------------------------------------------------------------|
|       |                               |                                     |                    | Nat Genet 2010)                                                                                   |
| KITLG | Soft Tissue Sarcoma           | 6% Amplification<br>0.4% Deletion   | 15 of 235 patients | Sarcoma (TCGA, Provisional)                                                                       |
| KITLG | Prostate Adenocarcinoma       | 5.4% Amplification                  | 3 of 56 patients   | Prostate Adenocarcinoma (Broad/Cornell, Cell 2013)                                                |
| KITLG | Acral Melanoma                | 5.3% Amplification                  | 2 of 38 patients   | Integrated genomic analyses reveal frequent TERT aberrations in acral melanoma. (Genome Res 2017) |
| KITLG | Prostate Adenocarcinoma       | 4.4% Amplification                  | 6 of 136 patients  | Prostate Adenocarcinoma (Fred Hutchinson CRC, Nat Med 2016)                                       |
| KITLG | Cutaneous Melanoma            | 0.3% Amplification<br>3.1% Mutation | 10 of 287 patients | Skin Cutaneous Melanoma (TCGA, Provisional)                                                       |
| KITLG | Diffuse Large B-Cell Lymphoma | 3.4% Mutation                       | 2 of 58 patients   | Diffuse Large B-Cell Lymphoma (Broad, PNAS 2012)                                                  |
| KITLG | Adrenocortical Carcinoma      | 3.4% Amplification                  | 3 of 87 patients   | Adrenocortical Carcinoma (TCGA,                                                                   |

|       |                              |                                                      |                    |                                                                     |
|-------|------------------------------|------------------------------------------------------|--------------------|---------------------------------------------------------------------|
| KITLG | Cutaneous Melanoma           | 3.3% Mutation                                        | 4 of 121 patients  | Skin Cutaneous Melanoma (Broad, Cell 2012)                          |
| KITLG | Ovarian Cancer               | 1.9% Amplification<br>0.3% Mutation<br>0.3% Deletion | 8 of 310 patients  | Ovarian Serous Cystadenocarcinoma (TCGA, Provisional)               |
| KITLG | Bladder Urothelial Carcinoma | 1.6% Amplification<br>0.8% Mutation                  | 3 of 127 patients  | Bladder Urothelial Carcinoma (TCGA, Provisional)                    |
| KITLG | Bladder Urothelial Carcinoma | 1.6% Amplification<br>0.8% Mutation                  | 3 of 127 patients  | Bladder Urothelial Carcinoma (TCGA, Nature 2014)                    |
| KITLG | Esophagogastric Cancer       | 0.5% Amplification<br>1.1% Mutation<br>0.5% Deletion | 4 of 183 patients  | Esophageal Carcinoma (TCGA, Provisional)                            |
| KITLG | Non-Hodgkin Lymphoma         | 2.1% Mutation                                        | 1 of 47 patients   | Lymphoid Neoplasm Diffuse Large B-cell Lymphoma (TCGA, Provisional) |
| KITLG | Breast Invasive Carcinoma    | 1.5% Amplification<br>0.4% Mutation                  | 16 of 816 patients | Breast Invasive Carcinoma (TCGA, Cell 2015)                         |
| KITLG | Prostate                     | 1.9% Amplification                                   | 2 of 103 patients  | Prostate                                                            |

|       |                                                                |                                     |                    |                                                          |
|-------|----------------------------------------------------------------|-------------------------------------|--------------------|----------------------------------------------------------|
|       | Adenocarcinoma                                                 |                                     |                    | Adenocarcinoma (MSKCC, Cancer Cell 2010)                 |
| KITLG | Uterine Carcinosarcoma/Uterine Malignant Mixed Mullerian Tumor | 1.8% Mutation                       | 1 of 56 patients   | Uterine Carcinosarcoma (TCGA, Provisional)               |
| KITLG | Breast Cancer                                                  | 1.5% Amplification<br>0.3% Mutation | 17 of 962 patients | Breast Invasive Carcinoma (TCGA, Provisional)            |
| KITLG | Stomach Adenocarcinoma                                         | 1% Mutation<br>0.7% Deletion        | 5 of 287 patients  | Stomach Adenocarcinoma (TCGA, Nature 2014)               |
| KITLG | Adenoid Cystic Carcinoma                                       | 1.7% Amplification                  | 1 of 60 patients   | Adenoid Cystic Carcinoma (MSKCC, Nat Genet 2013)         |
| KITLG | Uterine Serous Carcinoma/Uterine Papillary Serous Carcinoma    | 2.3% Amplification                  | 1 of 43 patients   | Uterine Corpus Endometrial Carcinoma (TCGA, Nature 2013) |
| KITLG | Uterine Endometrioid Carcinoma                                 | 1.3% Mutation                       | 3 of 193 patients  | Uterine Corpus Endometrial Carcinoma (TCGA, Nature 2013) |
| KITLG | Uterine Serous Carcinoma/Uterine Papillary Serous Carcinoma    | 2.3% Amplification                  | 1 of 43 patients   | Uterine Corpus Endometrial Carcinoma (TCGA, Provisional) |

|       |                                |                                     |                    |                                                              |
|-------|--------------------------------|-------------------------------------|--------------------|--------------------------------------------------------------|
| KITLG | Uterine Endometrioid Carcinoma | 1.5% Mutation                       | 3 of 195 patients  | Uterine Corpus Endometrial Carcinoma (TCGA, Provisional)     |
| KITLG | Prostate Adenocarcinoma        | 1.6% Amplification                  | 1 of 61 patients   | Prostate Adenocarcinoma , Metastatic (Michigan, Nature 2012) |
| KITLG | Mixed Cancer Types             | 1.2% Amplification<br>0.3% Deletion | 14 of 881 patients | Cancer Cell Line Encyclopedia (Novartis/Broad, Nature 2012)  |
| KITLG | Breast Invasive Carcinoma      | 1.5% Amplification                  | 7 of 482 patients  | Breast Invasive Carcinoma (TCGA, Nature 2012)                |
| KITLG | Astrocytoma                    | 6.5% Deletion                       | 2 of 31 patients   | Brain Lower Grade Glioma (TCGA, Provisional)                 |
| KITLG | Oligodendroglioma              | 1.5% Deletion                       | 1 of 66 patients   | Brain Lower Grade Glioma (TCGA, Provisional)                 |
| KITLG | Anaplastic Astrocytoma         | 1.5% Deletion                       | 1 of 67 patients   | Brain Lower Grade Glioma (TCGA, Provisional)                 |
| KITLG | Hepatobiliary Cancer           | 0.8% Amplification<br>0.5% Mutation | 5 of 365 patients  | Liver Hepatocellular Carcinoma (TCGA,                        |

|       |                                                 |                                     |                     |                                                         |
|-------|-------------------------------------------------|-------------------------------------|---------------------|---------------------------------------------------------|
|       |                                                 |                                     |                     | Provisional)                                            |
| KITLG | Breast Cancer                                   | 1.3% Amplification<br>0% Deletion   | 28 of 2050 patients | Breast Cancer (METABRIC, Nature 2012 & Nat Commun 2016) |
| KITLG | Mucinous Adenocarcinoma of the Colon and Rectum | 4.3% Mutation                       | 1 of 23 patients    | Colorectal Adenocarcinoma (TCGA, Provisional)           |
| KITLG | Colon Adenocarcinoma                            | 0.8% Mutation<br>0.8% Deletion      | 2 of 129 patients   | Colorectal Adenocarcinoma (TCGA, Provisional)           |
| KITLG | Pancreatic Cancer                               | 0.7% Amplification<br>0.7% Deletion | 2 of 148 patients   | Pancreatic Adenocarcinoma (TCGA, Provisional)           |
| KITLG | Lung Adenocarcinoma                             | 0.4% Mutation<br>0.9% Deletion      | 3 of 230 patients   | Lung Adenocarcinoma (TCGA, Provisional)                 |
| KITLG | Non-Small Cell Lung Cancer                      | 0.4% Mutation<br>0.9% Deletion      | 3 of 223 patients   | Lung Adenocarcinoma (TCGA, Nature 2014)                 |
| KITLG | Mucinous Stomach Adenocarcinoma                 | 5% Deletion                         | 1 of 20 patients    | Stomach Adenocarcinoma (TCGA, Provisional)              |
| KITLG | Stomach Adenocarcinoma                          | 1.8% Mutation                       | 4 of 227 patients   | Stomach Adenocarcinoma (TCGA,                           |



|       |                                        |                                                      |                   |                                                                                      |
|-------|----------------------------------------|------------------------------------------------------|-------------------|--------------------------------------------------------------------------------------|
|       |                                        |                                                      |                   | Provisional)                                                                         |
| KITLG | High-Grade Serous Ovarian Cancer       | 0.6% Amplification<br>0.3% Mutation<br>0.3% Deletion | 4 of 316 patients | Ovarian Serous Cystadenocarcinoma (TCGA, Nature 2011)                                |
| KITLG | Pleural Mesothelioma, Epithelioid Type | 1.8% Amplification                                   | 1 of 57 patients  | Mesothelioma (TCGA, Provisional)                                                     |
| KITLG | Cutaneous Melanoma                     | 1.1% Mutation                                        | 1 of 91 patients  | Skin Cutaneous Melanoma (Yale, Nat Genet 2012)                                       |
| KITLG | Glioblastoma Multiforme                | 1.1% Mutation                                        | 1 of 91 patients  | Glioblastoma (TCGA, Nature 2008)                                                     |
| KITLG | Cervical Squamous Cell Carcinoma       | 0.6% Mutation<br>0.6% Deletion                       | 2 of 155 patients | Cervical Squamous Cell Carcinoma and Endocervical Adenocarcinoma (TCGA, Provisional) |
| KITLG | Prostate Adenocarcinoma                | 1% Amplification                                     | 5 of 492 patients | Prostate Adenocarcinoma (TCGA, Provisional)                                          |
| KITLG | Bladder Urothelial Carcinoma           | 1% Mutation                                          | 1 of 99 patients  | Bladder Urothelial Carcinoma (BGI, Nat Genet 2013)                                   |
| KITLG | Stomach Adenocarcinoma                 | 1% Mutation                                          | 1 of 100 patients | Stomach Adenocarcinoma (Pfizer and UHK, Nat Genet 2014)                              |

|       |                                   |                                                      |                    |                                                                              |
|-------|-----------------------------------|------------------------------------------------------|--------------------|------------------------------------------------------------------------------|
| KITLG | Colorectal Adenocarcinoma         | 0.9% Amplification                                   | 2 of 212 patients  | Colorectal Adenocarcinoma (TCGA, Nature 2012)                                |
| KITLG | Lung Adenocarcinoma               | 0.2% Amplification<br>1.1% Mutation<br>0.3% Deletion | 10 of 660 patients | Pan-Lung Cancer (TCGA, Nat Genet 2016)                                       |
| KITLG | Esophagogastric Carcinoma         | 1.3% Deletion                                        | 1 of 77 patients   | TCGA data for Esophagus-Stomach Cancers (TCGA, Nature 2017)                  |
| KITLG | Kidney Renal Clear Cell Carcinoma | 0.4% Mutation<br>0.2% Deletion                       | 3 of 448 patients  | Kidney Renal Clear Cell Carcinoma (TCGA, Provisional)                        |
| KITLG | Metastatic Prostate Cancer        | 0.7% Amplification                                   | 1 of 150 patients  | Metastatic Prostate Cancer, SU2C/PCF Dream Team (Robinson et al., Cell 2015) |
| KITLG | Ampullary Carcinoma               | 1.6% Mutation                                        | 1 of 62 patients   | Ampullary Carcinoma (Baylor College of Medicine, Cell Reports 2016)          |
| KITLG | Lung Adenocarcinoma               | 0.5% Mutation                                        | 1 of 182 patients  | Lung Adenocarcinoma (Broad, Cell 2012)                                       |
| KITLG | Acute Myeloid Leukemia            | 0.5% Deletion                                        | 1 of 188 patients  | Acute Myeloid Leukemia                                                       |

|       |                                       |                                     |                   |                                                           |
|-------|---------------------------------------|-------------------------------------|-------------------|-----------------------------------------------------------|
|       |                                       |                                     |                   | (TCGA, Provisional)                                       |
| KITLG | Acute Myeloid Leukemia                | 0.5% Deletion                       | 1 of 191 patients | Acute Myeloid Leukemia (TCGA, NEJM 2013)                  |
| KITLG | Kidney Renal Clear Cell Carcinoma     | 0.5% Mutation                       | 2 of 418 patients | Kidney Renal Clear Cell Carcinoma (TCGA, Nature 2013)     |
| KITLG | Liver Hepatocellular Carcinoma        | 0.4% Mutation                       | 1 of 231 patients | Liver Hepatocellular Carcinoma (AMC, Hepatology 2014)     |
| KITLG | Hepatocellular Carcinomas             | 0.4% Mutation                       | 1 of 243 patients | Hepatocellular Carcinomas (Inserm, Nat Genet 2015)        |
| KITLG | Head and Neck Squamous Cell Carcinoma | 0.2% Amplification<br>0.2% Mutation | 2 of 504 patients | Head and Neck Squamous Cell Carcinoma (TCGA, Provisional) |
| KITLG | Glioblastoma Multiforme               | 0.4% Deletion                       | 1 of 273 patients | Glioblastoma Multiforme (TCGA, Provisional)               |
| KITLG | Head and Neck Squamous Cell Carcinoma | 0.4% Amplification                  | 1 of 279 patients | Head and Neck Squamous Cell Carcinoma (TCGA, Nature 2015) |

|       |                              |                    |                   |                                                     |
|-------|------------------------------|--------------------|-------------------|-----------------------------------------------------|
| KITLG | Glioblastoma                 | 0.4% Deletion      | 1 of 281 patients | Glioblastoma (TCGA, Cell 2013)                      |
| KITLG | Merged Cohort of LGG and GBM | 0.3% Deletion      | 2 of 794 patients | Merged Cohort of LGG and GBM (TCGA, Cell 2016)      |
| KITLG | Papillary Thyroid Carcinoma  | 0.3% Amplification | 1 of 399 patients | Papillary Thyroid Carcinoma (TCGA, Cell 2014)       |
| KITLG | Colorectal Adenocarcinoma    | 0.2% Mutation      | 1 of 619 patients | Colorectal Adenocarcinoma (DFCI, Cell Reports 2016) |

**Table S2. Mutations and Amplifications of SCF/KITLG in Cancer Datasets.** Using cBioPortal the percentage of amplifications, mutations, deletions, and alterations were mined for the *KITLG* gene across all available cancers. Summarized data is shown in the table.

| <b>Genes</b> | <b>Cancer Type</b>                | <b>% amplification or mutation or deletion</b>    | <b># of Patients altered of total # of patients</b> | <b>Co-occurrence</b>                                     | <b>Source data</b>                         |
|--------------|-----------------------------------|---------------------------------------------------|-----------------------------------------------------|----------------------------------------------------------|--------------------------------------------|
| KIT<br>AKT1  | Neuroendocrine<br>Prostate Cancer | 31%<br>amplification on<br>KIT+AKT1               | 24 of 77<br>patients                                | Significant<br>tendency<br>p=0.016                       | Trento/Cornell/<br>Broad 2016              |
| KIT<br>AKT1  | Prostate<br>adenocarcinoma        | 0.4% mutation<br>on KIT+AKT1                      | 2 of 449<br>patients                                | Tendency<br>towards<br>mutual<br>exclusivity<br>p= 0.998 | CPC-GENE,<br>Nature 2017                   |
| KIT<br>AKT1  | Prostate<br>adenocarcinoma        | 1.6% mutation<br>on KIT+AKT1                      | 7 of 451<br>patients                                | Tendency<br>towards<br>mutual<br>exclusivity<br>p= 0.980 | MSK, JCO<br>Precision<br>Oncology 2017     |
| KIT<br>AKT1  | Prostate<br>adenocarcinoma        | 7% mutation and<br>amplification on<br>KIT+AKT1   | 10 of 150<br>patients                               | Tendency<br>towards<br>mutual<br>exclusivity<br>p=0.842  | Robinson et al,<br>Cell 2015               |
| KIT<br>AKT1  | Prostate<br>adenocarcinoma        | 4% mutation and<br>amplification on<br>KIT only   | 2 of 56<br>patients                                 | Tendency<br>towards<br>co-<br>occurrence<br>p=1.000      | Broad/Cornell,<br>Cell 2013                |
| KIT<br>AKT1  | Prostate<br>adenocarcinoma        | 17% mutation<br>and amplification<br>on KIT+AKT1  | 19 Of 109<br>patients                               | Tendency<br>towards<br>mutual<br>exclusivity<br>p=0.835  | Broad/Cornell,<br>Nat Genet 2012           |
| KIT<br>AKT1  | Prostate<br>adenocarcinoma        | 7% mutation and<br>amplification on<br>KIT+AKT1   | 4 of 54<br>patients                                 | Tendency<br>towards<br>co-<br>occurrence<br>p=0.072      | Fred<br>Hutchinson<br>CRC, Nat Med<br>2016 |
| KIT<br>AKT1  | Prostate<br>adenocarcinoma        | 1.9% mutation<br>and amplification<br>on KIT only | 2 of 103<br>patients                                | Tendency<br>towards<br>co-<br>occurrence<br>p=1.000      | MSKCC,<br>Cancer Cell<br>2010              |

|             |                                   |                                                                          |                       |                                                                 |                                        |
|-------------|-----------------------------------|--------------------------------------------------------------------------|-----------------------|-----------------------------------------------------------------|----------------------------------------|
| KIT<br>AKT1 | Prostate<br>adenocarcinoma        | 3% mutation,<br>amplification and<br>deletion on<br>KIT+AKT1             | 11 of 333<br>patients | Tendency<br>towards<br>mutual<br>exclusivity<br>p=0.918         | TCGA, Cell<br>2015                     |
| KIT<br>AKT1 | Prostate<br>adenocarcinoma        | 2.8% mutation,<br>amplification and<br>deletion on<br>KIT+AKT1           | 14 of 492<br>patients | Tendency<br>toward<br>mutual<br>exclusivity<br>p=0.904          | TCGA,<br>Provisional                   |
| KIT<br>AKT1 | Prostate<br>adenocarcinoma        | 0% alterations                                                           | 0 of 104<br>patients  | Tendency<br>towards<br>co-<br>occurrence<br>p=1.000             | MSKCC, PNAS<br>2014                    |
| KIT<br>AKT1 | Prostate<br>adenocarcinoma        | 0% alterations                                                           | 0 of 7<br>patients    | Tendency<br>towards co-<br>occurrence<br>p=1.000                | MSKCC, Cell<br>2014                    |
| KIT<br>AKT1 | Prostate<br>adenocarcinoma        | 1.7% mutation<br>and deletion on<br>KIT only                             | 1 of 59<br>patients   | Tendency<br>towards co-<br>occurrence<br>p=1.000                | Michigan,<br>Nature 2012               |
| KIT<br>PTEN | Prostate<br>adenocarcinoma        | 1.3% mutation<br>on KIT+PTEN                                             | 6 of 449<br>patients  | Tendency<br>towards<br>mutual<br>exclusivity<br>p=0.989         | CPC-GENE,<br>Nature 2017               |
| KIT<br>PTEN | Prostate<br>adenocarcinoma        | 19% mutation,<br>deletion, and<br>fusion on<br>KIT+PTEN                  | 86 of 448<br>patients | Tendency<br>towards co-<br>occurrence<br>p=0.327                | MSK, JCO<br>Precision<br>Oncology 2017 |
| KIT<br>PTEN | Prostate<br>adenocarcinoma        | 43% mutation,<br>amplification,<br>deletion and<br>fusion on<br>KIT+PTEN | 65 of 150<br>patients | Tendency<br>towards<br>mutual<br>exclusivity<br>p=0.074         | Robinson et al.,<br>Cell 2015          |
| KIT<br>PTEN | Neuroendocrine<br>prostate cancer | 36% mutation,<br>amplification,<br>and deep<br>deletion on<br>KIT+PTEN   | 28 of 77<br>patients  | Significant<br>tendency<br>towards co-<br>occurrence<br>p=0.010 | Trento/Cornell/<br>Broad 2016          |

|             |                         |                                                            |                     |                                                |                                   |
|-------------|-------------------------|------------------------------------------------------------|---------------------|------------------------------------------------|-----------------------------------|
| KIT<br>PTEN | Prostate adenocarcinoma | 20% mutation, amplification and deep deletion on KIT+PTEN  | 11 of 56 patients   | Tendency towards co-occurrence<br>p=0.328      | Broad/Cornell, Cell 2013          |
| KIT<br>PTEN | Prostate adenocarcinoma | 23% mutation, amplification, and deep deletion on KIT+PTEN | 25 of 109 patients  | Tendency towards mutual exclusivity<br>p=0.607 | Broad/ Cornell, Nat Genet 2012    |
| KIT<br>PTEN | Prostate adenocarcinoma | 48% mutation, amplification and deep deletion on KIT+PTEN  | 26 of 54 patients   | Tendency towards mutual exclusivity<br>p=0.371 | Fred Hutchinson CRC, Nat Med 2016 |
| KIT<br>PTEN | Prostate adenocarcinoma | 17% mutation, amplification, and deep deletion on KIT+PTEN | 17 of 103 patients  | Tendency towards mutual exclusivity<br>p=0.729 | MSKCC, Cancer Cell 2010           |
| KIT<br>PTEN | Prostate adenocarcinoma | 18% mutation, amplification, and deep deletion on KIT+PTEN | 61 of 333 patients  | Tendency towards co-occurrence<br>p=0.537      | TCGA, Cell 2015                   |
| KIT<br>PTEN | Prostate adenocarcinoma | 23% mutation, amplification, and deep deletion on KIT+PTEN | 112 of 492 patients | Tendency towards mutual exclusivity<br>p=0.534 | TCGA, Provisional                 |
| KIT<br>PTEN | Prostate adenocarcinoma | 1.9% deep deletion on PTEN only                            | 2 of 104 patients   | Tendency towards co-occurrence<br>p=1.000      | MSKCC, PNAS 2014                  |
| KIT<br>PTEN | Prostate adenocarcinoma | 0% alterations                                             | 0 of 7 patients     | Tendency towards co-occurrence<br>p=1.000      | MSKCC, Cell 2014                  |
| KIT<br>PTEN | Prostate adenocarcinoma | 51% mutation and deep deletion on KIT+PTEN                 | 30 of 59 patients   | Tendency towards co-occurrence<br>p=0.492      | Michigan, Nature 2012             |

|             |                                   |                                                                       |                       |                                                                 |                                            |
|-------------|-----------------------------------|-----------------------------------------------------------------------|-----------------------|-----------------------------------------------------------------|--------------------------------------------|
| KIT<br>KRAS | Prostate<br>adenocarcinoma        | 0.2% mutation<br>on KIT only                                          | 1 of 449<br>patients  | Tendency<br>towards co-<br>occurrence<br>p=1.000                | CPC-GENE,<br>Nature 2017                   |
| KIT<br>KRAS | Prostate<br>adenocarcinoma        | 2% mutation,<br>amplification,<br>and deep<br>deletion on<br>KIT+KRAS | 9 of 448<br>patients  | Tendency<br>towards<br>mutual<br>exclusivity<br>p=0.968         | MSK, JCO<br>Precision<br>Oncology 2017     |
| KIT<br>KRAS | Prostate<br>adenocarcinoma        | 5% mutation and<br>amplification on<br>KIT+KRAS                       | 8 of 150<br>patients  | Tendency<br>towards co-<br>occurrence<br>p=0.128                | Robinson, et<br>al., Cell 2015             |
| KIT<br>KRAS | Neuroendocrine<br>prostate cancer | 25% mutation<br>and amplification<br>on KIT+KRAS                      | 19 of 77<br>patients  | Significant<br>tendency<br>towards co-<br>occurrence<br>p<0.001 | Trento/Cornell/<br>Broad 2016              |
| KIT<br>KRAS | Prostate<br>adenocarcinoma        | 7% mutation and<br>amplification on<br>KIT+KRAS                       | 4 of 56<br>patients   | Tendency<br>towards co-<br>occurrence<br>p=0.105                | Broad/Cornell,<br>Cell 2013                |
| KIT<br>KRAS | Prostate<br>adenocarcinoma        | 17%<br>amplification on<br>KIT only                                   | 18 of 109<br>patients | Tendency<br>towards co-<br>occurrence<br>p=1.000                | Broad/Cornell,<br>Nat Genet 2012           |
| KIT<br>KRAS | Prostate<br>adenocarcinoma        | 7% mutation and<br>amplification on<br>KIT+KRAS                       | 4 of 54<br>patients   | Tendency<br>towards<br>mutual<br>exclusivity<br>p=0.942         | Fred<br>Hutchinson<br>CRC, Nat Med<br>2016 |
| KIT<br>KRAS | Prostate<br>adenocarcinoma        | 5% mutation,<br>amplification and<br>deep deletion on<br>KIT+KRAS     | 5 of 103<br>patients  | Tendency<br>towards<br>mutual<br>exclusivity<br>p=0.942         | MSKCC,<br>Cancer Cell<br>2010              |
| KIT<br>KRAS | Prostate<br>adenocarcinoma        | 2.1%<br>amplification and<br>deep deletion on<br>KIT+KRAS             | 7 of 333<br>patients  | Tendency<br>towards<br>mutual<br>exclusivity<br>p=0.964         | TCGA, Cell<br>2015                         |



|             |                                   |                                                                         |                       |                                                                 |                                        |
|-------------|-----------------------------------|-------------------------------------------------------------------------|-----------------------|-----------------------------------------------------------------|----------------------------------------|
| KIT<br>KRAS | Prostate<br>adenocarcinoma        | 2.4% mutation,<br>amplification,<br>and deep<br>deletion on<br>KIT+KRAS | 12 of 492<br>patients | Tendency<br>towards co-<br>occurrence<br>p=0.083                | TCGA,<br>Provisional                   |
| KIT<br>KRAS | Prostate<br>adenocarcinoma        | 0% alterations<br>on KIT+KRAS                                           | 0 of 104<br>patients  | Tendency<br>towards co-<br>occurrence<br>p= 1.000               | MSKCC, PNAS<br>2014                    |
| KIT<br>KRAS | Prostate<br>adenocarcinoma        | 0% alterations<br>on KIT+KRAS                                           | 0 of 7<br>patients    | Tendency<br>towards co-<br>occurrence<br>p=1.000                | MSKCC, Cell<br>2014                    |
| KIT<br>KRAS | Prostate<br>adenocarcinoma        | 8% mutation,<br>amplification and<br>deep deletion on<br>KIT+KRAS       | 5 of 59<br>patients   | Tendency<br>towards<br>mutual<br>exclusivity<br>p=0.934         | Michigan,<br>Nature 2012               |
| KIT<br>SRC  | Prostate<br>adenocarcinoma        | 0.2% mutation<br>on KIT only                                            | 1 of 449<br>patients  | Tendency<br>towards co-<br>occurrence<br>p=1.000                | CPC-GENE,<br>Nature 2017               |
| KIT<br>SRC  | Prostate<br>adenocarcinoma        | 0.4% mutation<br>on KIT only                                            | 2 of 448<br>patients  | Tendency<br>towards co-<br>occurrence<br>p=1.000                | MSK, JCO<br>Precision<br>Oncology 2017 |
| KIT<br>SRC  | Prostate<br>adenocarcinoma        | 5% mutation,<br>amplification and<br>deep deletion on<br>KIT+KRAS       | 7 of 150<br>patients  | Tendency<br>towards<br>mutual<br>exclusivity<br>p=0.934         | Robinson et al.,<br>Cell 2015          |
| KIT<br>SRC  | Neuroendocrine<br>prostate cancer | 27% mutation<br>and amplification<br>on KIT+KRAS                        | 21 of 77<br>patients  | Significant<br>tendency<br>towards co-<br>occurrence<br>p=2.367 | Trento/Cornell/<br>Broad 2016          |
| KIT<br>SRC  | Prostate<br>adenocarcinoma        | 4% mutation and<br>amplification on<br>KIT only                         | 2 of 56<br>patients   | Tendency<br>towards co-<br>occurrence<br>p=1.000                | Broad/Cornell,<br>Cell 2013            |

|         |                         |                                                           |                    |                                                |                                   |
|---------|-------------------------|-----------------------------------------------------------|--------------------|------------------------------------------------|-----------------------------------|
| KIT SRC | Prostate adenocarcinoma | 17% mutation and amplification on KIT+SRC                 | 18 of 109 patients | Tendency towards co-occurrence<br>p=0.165      | Broad/Cornell, Nat Genet 2012     |
| KIT SRC | Prostate adenocarcinoma | 11% mutation, amplification and deep deletion on KIT+SRC  | 6 of 54 patients   | Tendency towards mutual exclusivity<br>p=0.942 | Fred Hutchinson CRC, Nat Med 2016 |
| KIT SRC | Prostate adenocarcinoma | 2.9% mutation and amplification on KIT+SRC                | 3 of 103 patients  | Tendency towards mutual exclusivity<br>p=0.981 | MSKCC, Cancer Cell 2010           |
| KIT SRC | Prostate adenocarcinoma | 3% amplification and deep deletion on KIT+SRC             | 10 of 333 patients | Tendency towards mutual exclusivity<br>p=0.930 | TCGA, Cell 2015                   |
| KIT SRC | Prostate adenocarcinoma | 2.4% mutation, amplification and deep deletion on KIT+SRC | 12 of 492 patients | Tendency towards mutual exclusivity<br>p=0.931 | TCGA, Provisional                 |
| KIT SRC | Prostate adenocarcinoma | Genes not sequenced                                       | 0 of 104 patients  | Tendency towards co-occurrence<br>p=1.000      | MSKCC, PNAS 2014                  |
| KIT SRC | Prostate adenocarcinoma | 0% alterations                                            | 0 of 7 patients    | Tendency towards co-occurrence<br>p=1.000      | MSKCC, Cell 2014                  |
| KIT SRC | Prostate adenocarcinoma | 1.7% deep deletion on KIT only                            | 1 of 59 patients   | Tendency towards co-occurrence<br>p=1.000      | Michigan, Nature 2012             |

|             |                                   |                                                        |                       |                                                                 |                                            |
|-------------|-----------------------------------|--------------------------------------------------------|-----------------------|-----------------------------------------------------------------|--------------------------------------------|
| KIT<br>WNT3 | Prostate<br>adenocarcinoma        | 0.2% mutation<br>on KIT only                           | 1 of 449<br>patients  | Tendency<br>towards co-<br>occurrence<br>p=1.000                | CPC-GENE,<br>Nature 2017                   |
| KIT<br>WNT3 | Prostate<br>adenocarcinoma        | 0.4% mutation<br>on KIT only;<br>WNT3 not<br>sequenced | 2 of 448<br>patients  | Tendency<br>towards co-<br>occurrence<br>p=1.000                | MSK, JCO<br>Precision<br>Oncology 2017     |
| KIT<br>WNT3 | Prostate<br>adenocarcinoma        | 4% mutation and<br>amplification on<br>KIT+WNT3        | 6 of 150<br>patients  | Tendency<br>towards<br>mutual<br>exclusivity<br>p=0.967         | Robinson et al.,<br>Cell 2015              |
| KIT<br>WNT3 | Neuroendocrine<br>prostate cancer | 29% mutation<br>and amplification<br>on KIT+WNT3       | 22 of 77<br>patients  | Significant<br>tendency<br>towards co-<br>occurrence<br>p<0.001 | Trento/Cornell/<br>Broad 2016              |
| KIT<br>WNT3 | Prostate<br>adenocarcinoma        | 4% mutation and<br>amplification on<br>KIT only        | 2 of 56<br>patients   | Tendency<br>towards co-<br>occurrence<br>p=1.000                | Broad/Cornell,<br>Cell 2013                |
| KIT<br>WNT3 | Prostate<br>adenocarcinoma        | 17% mutation<br>and amplification<br>on KIT+WNT3       | 19 of 109<br>patients | Tendency<br>towards<br>mutual<br>exclusivity<br>p=0.835         | Broad/Cornell,<br>Nat Genet 2012           |
| KIT<br>WNT3 | Prostate<br>adenocarcinoma        | 9% mutation and<br>amplification on<br>KIT+WNT3        | 5 of 54<br>patients   | Tendency<br>towards<br>mutual<br>exclusivity<br>p=0.928         | Fred<br>Hutchinson<br>CRC, Nat Med<br>2016 |
| KIT<br>WNT3 | Prostate<br>adenocarcinoma        | 1.9% mutation<br>and amplification<br>on KIT only      | 2 of 103<br>patients  | Tendency<br>towards co-<br>occurrence<br>p=1.000                | MSKCC,<br>Cancer Cell<br>2010              |

|              |                                   |                                                              |                       |                                                                    |                                   |
|--------------|-----------------------------------|--------------------------------------------------------------|-----------------------|--------------------------------------------------------------------|-----------------------------------|
| KIT<br>WNT3  | Prostate<br>adenocarcinoma        | 5% amplification<br>and deep<br>deletion on<br>KIT+WNT3      | 16 of 333<br>patients | Tendency<br>towards<br>mutual<br>exclusivity<br>p=0.863            | TCGA, Cell<br>2015                |
| KIT<br>WNT3  | Prostate<br>adenocarcinoma        | 4% mutation,<br>amplification and<br>deletion on<br>KIT+WNT3 | 20 of 492<br>patients | Tendency<br>towards<br>mutual<br>exclusivity<br>p=0.828            | TCGA,<br>Provisional              |
| KIT<br>WNT3  | Prostate<br>adenocarcinoma        | Genes not<br>sequenced                                       | 0 of 104<br>patients  | Tendency<br>towards<br>co-<br>occurrence<br>p=1.000                | MSKCC, PNAS<br>2014               |
| KIT<br>WNT3  | Prostate<br>adenocarcinoma        | 0% alterations                                               | 0 of 7<br>patients    | Tendency<br>towards<br>co-<br>occurrence<br>p=1.000                | MSKCC, Cell<br>2014               |
| KIT<br>WNT3  | Prostate<br>adenocarcinoma        | 5% mutation and<br>deep deletion on<br>KIT+WNT3              | 3 of 59<br>patients   | Tendency<br>towards<br>mutual<br>exclusivity<br>p=0.967            | Michigan,<br>Nature 2012          |
| KIT<br>WNT5A | Prostate<br>adenocarcinoma        | 0.2% mutation<br>on KIT only                                 | 1 of 449<br>patients  | Tendency<br>towards<br>co-<br>occurrence<br>p=1.000                | CPC-GENE,<br>Nature 2017          |
| KIT<br>WNT5A | Prostate<br>adenocarcinoma        | 0.4% mutation<br>on KIT only;<br>WNT5A not<br>sequenced      | 2 of 448<br>patients  | Tendency<br>towards<br>co-<br>occurrence<br>p=1.000                | MSK, JCO<br>Precision<br>Oncology |
| KIT<br>WNT5A | Prostate<br>adenocarcinoma        | 4% mutation and<br>amplification on<br>KIT+WNT3              | 6 of 150<br>patients  | Tendency<br>towards<br>mutual<br>exclusivity<br>p=0.967            | Robinson et al.,<br>2015          |
| KIT<br>WNT5A | Neuroendocrine<br>prostate cancer | 35% mutation<br>and amplification<br>on KIT+WNT3             | 27 of 77<br>patients  | Significant<br>tendency<br>towards<br>co-<br>occurrence<br>p=1.386 | Trento/Cornell/<br>Broad 2016     |

|              |                            |                                                                          |                       |                                                         |                                            |
|--------------|----------------------------|--------------------------------------------------------------------------|-----------------------|---------------------------------------------------------|--------------------------------------------|
| KIT<br>WNT5A | Prostate<br>adenocarcinoma | 4% mutation and<br>amplification on<br>KIT only                          | 2 of 56<br>patients   | Tendency<br>towards co-<br>occurrence<br>p=1.000        | Broad/Cornell,<br>Cell 2013                |
| KIT<br>WNT5A | Prostate<br>adenocarcinoma | 17%<br>amplification on<br>KIT only                                      | 18 of 109<br>patients | Tendency<br>towards co-<br>occurrence<br>p=1.000        | Broad/Cornell,<br>Nat Genet 2012           |
| KIT<br>WNT5A | Prostate<br>adenocarcinoma | 6% mutation,<br>amplification and<br>deep deletion on<br>KIT+WNT5A       | 3 of 54<br>patients   | Tendency<br>towards<br>mutual<br>exclusivity<br>p=0.956 | Fred<br>Hutchinson<br>CRC, Nat Med<br>2016 |
| KIT<br>WNT5A | Prostate<br>adenocarcinoma | 1.9% mutation<br>and amplification<br>on KIT only                        | 2 of 103<br>patients  | Tendency<br>towards co-<br>occurrence<br>p=1.000        | MSKCC,<br>Cancer Cell<br>2010              |
| KIT<br>WNT5A | Prostate<br>adenocarcinoma | 2.4%<br>amplification and<br>deep deletion on<br>KIT+WNT5A               | 8 of 333<br>patients  | Tendency<br>towards<br>mutual<br>exclusivity<br>p=0.953 | TCGA, Cell<br>2015                         |
| KIT<br>WNT5A | Prostate<br>adenocarcinoma | 2.8% mutation,<br>amplification,<br>and deep<br>deletion on<br>KIT+WNT5A | 14 of 492<br>patients | Tendency<br>towards<br>mutual<br>exclusivity<br>p=0.904 | TCGA,<br>Provisional                       |
| KIT<br>WNT5A | Prostate<br>adenocarcinoma | Genes not<br>sequenced                                                   | 0 of 104<br>patients  | Tendency<br>towards co-<br>occurrence<br>p=1.000        | MSKCC, PNAS<br>2014                        |
| KIT<br>WNT5A | Prostate<br>adenocarcinoma | 0% alterations                                                           | 0 of 7<br>patients    | Tendency<br>towards co-<br>occurrence<br>p=1.000        | MSKCC, Cell<br>2014                        |
| KIT<br>WNT5A | Prostate<br>adenocarcinoma | 3% mutation and<br>deep deletion on<br>KIT+WNT5A                         | 2 of 59<br>patients   | Tendency<br>towards<br>mutual<br>exclusivity<br>p=0.984 | Michigan.<br>Nature 2012                   |

|               |                                   |                                                                     |                       |                                                                 |                                            |
|---------------|-----------------------------------|---------------------------------------------------------------------|-----------------------|-----------------------------------------------------------------|--------------------------------------------|
| KIT<br>NOTCH1 | Prostate<br>adenocarcinoma        | 0.2% mutation<br>on KIT only                                        | 1 of 449<br>patients  | Tendency<br>towards co-<br>occurrence<br>p=1.000                | CPC-GENE,<br>Nature 2017                   |
| KIT<br>NOTCH1 | Prostate<br>adenocarcinoma        | 2.5% mutation<br>and deep<br>deletion on<br>KIT+NOTCH1              | 11 of 448<br>patients | Tendency<br>towards<br>mutual<br>exclusivity<br>p=0.953         | MSK, JCO<br>Precision<br>Oncology 2017     |
| KIT<br>NOTCH1 | Prostate<br>adenocarcinoma        | 6% mutation and<br>amplification on<br>KIT+NOTCH1                   | 9 of 150<br>patients  | Tendency<br>towards co-<br>occurrence<br>p=0.158                | Robinson et al.,<br>Cell 2015              |
| KIT<br>NOTCH1 | Neuroendocrine<br>prostate cancer | 32% mutation<br>and amplification<br>on KIT+NOTCH1                  | 25 of 77<br>patients  | Significant<br>tendency<br>towards co-<br>occurrence<br>p<0.001 | Trento/Cornell/<br>Broad 2016              |
| KIT<br>NOTCH1 | Prostate<br>adenocarcinoma        | 5% mutation and<br>amplification on<br>KIT+NOTCH1                   | 3 of 56<br>patients   | Tendency<br>towards<br>mutual<br>exclusivity<br>p=0.964         | Broad/Cornell,<br>Cell 2013                |
| KIT<br>NOTCH1 | Prostate<br>adenocarcinoma        | 17%<br>amplification on<br>KIT only                                 | 18 of 109<br>patients | Tendency<br>towards co-<br>occurrence<br>p=1.000                | Broad/Cornell,<br>Nat Genet 2012           |
| KIT<br>NOTCH1 | Prostate<br>adenocarcinoma        | 17% mutation<br>and amplification<br>on KIT+NOTCH1                  | 9 of 54<br>patients   | Tendency<br>towards co-<br>occurrence<br>p=0.183                | Fred<br>Hutchinson<br>CRC. Nat Med<br>2016 |
| KIT<br>NOTCH1 | Prostate<br>adenocarcinoma        | 4% mutation,<br>amplification and<br>deep deletion on<br>KIT+NOTCH1 | 4 of 103<br>patients  | Tendency<br>towards<br>mutual<br>exclusivity<br>p=0.961         | MSKCC,<br>Cancer Cell<br>2010              |
| KIT<br>NOTCH1 | Prostate<br>adenocarcinoma        | 2.7%<br>amplification and<br>deep deletion on<br>KIT+NOTCH1         | 9 of 333<br>patients  | Tendency<br>towards<br>mutual<br>exclusivity<br>p=0.941         | TCGA, Cell<br>2015                         |

|               |                            |                                                                         |                       |                                                         |                          |
|---------------|----------------------------|-------------------------------------------------------------------------|-----------------------|---------------------------------------------------------|--------------------------|
| KIT<br>NOTCH1 | Prostate<br>adenocarcinoma | 3% mutation,<br>amplification and<br>deep deletion on<br>KIT+NOTCH1     | 16 of 492<br>patients | Tendency<br>towards co-<br>occurrence<br>p=0.135        | TCGA,<br>Provisional     |
| KIT<br>NOTCH1 | Prostate<br>adenocarcinoma | Genes not<br>sequenced                                                  | 0 of 104<br>patients  | Tendency<br>towards co-<br>occurrence<br>p=1.000        | MSKCC, PNAS<br>2014      |
| KIT<br>NOTCH1 | Prostate<br>adenocarcinoma | 0% alterations                                                          | 0 of 7<br>patients    | Tendency<br>towards co-<br>occurrence<br>p=1.000        | MSKCC, Cell<br>2014      |
| KIT<br>NOTCH1 | Prostate<br>adenocarcinoma | 7% mutation,<br>amplification,<br>and deep<br>deletion on<br>KIT+NOTCH1 | 4 of 59<br>patients   | Tendency<br>towards<br>mutual<br>exclusivity<br>p=0.951 | Michigan,<br>Nature 2012 |

**Table S3. Mutations and Amplifications of CD117/KIT and Associated Signaling Pathways in Cancer Datasets.** Using cBioPortal the percentage of amplifications, mutations, deletions, and alterations were mined for the *KIT* gene and signaling genes for prostate adenocarcinoma. Summarized data is shown in the table.
